# Supplementary material
Source: PubMed Central journal article supplement (PMC1175001)

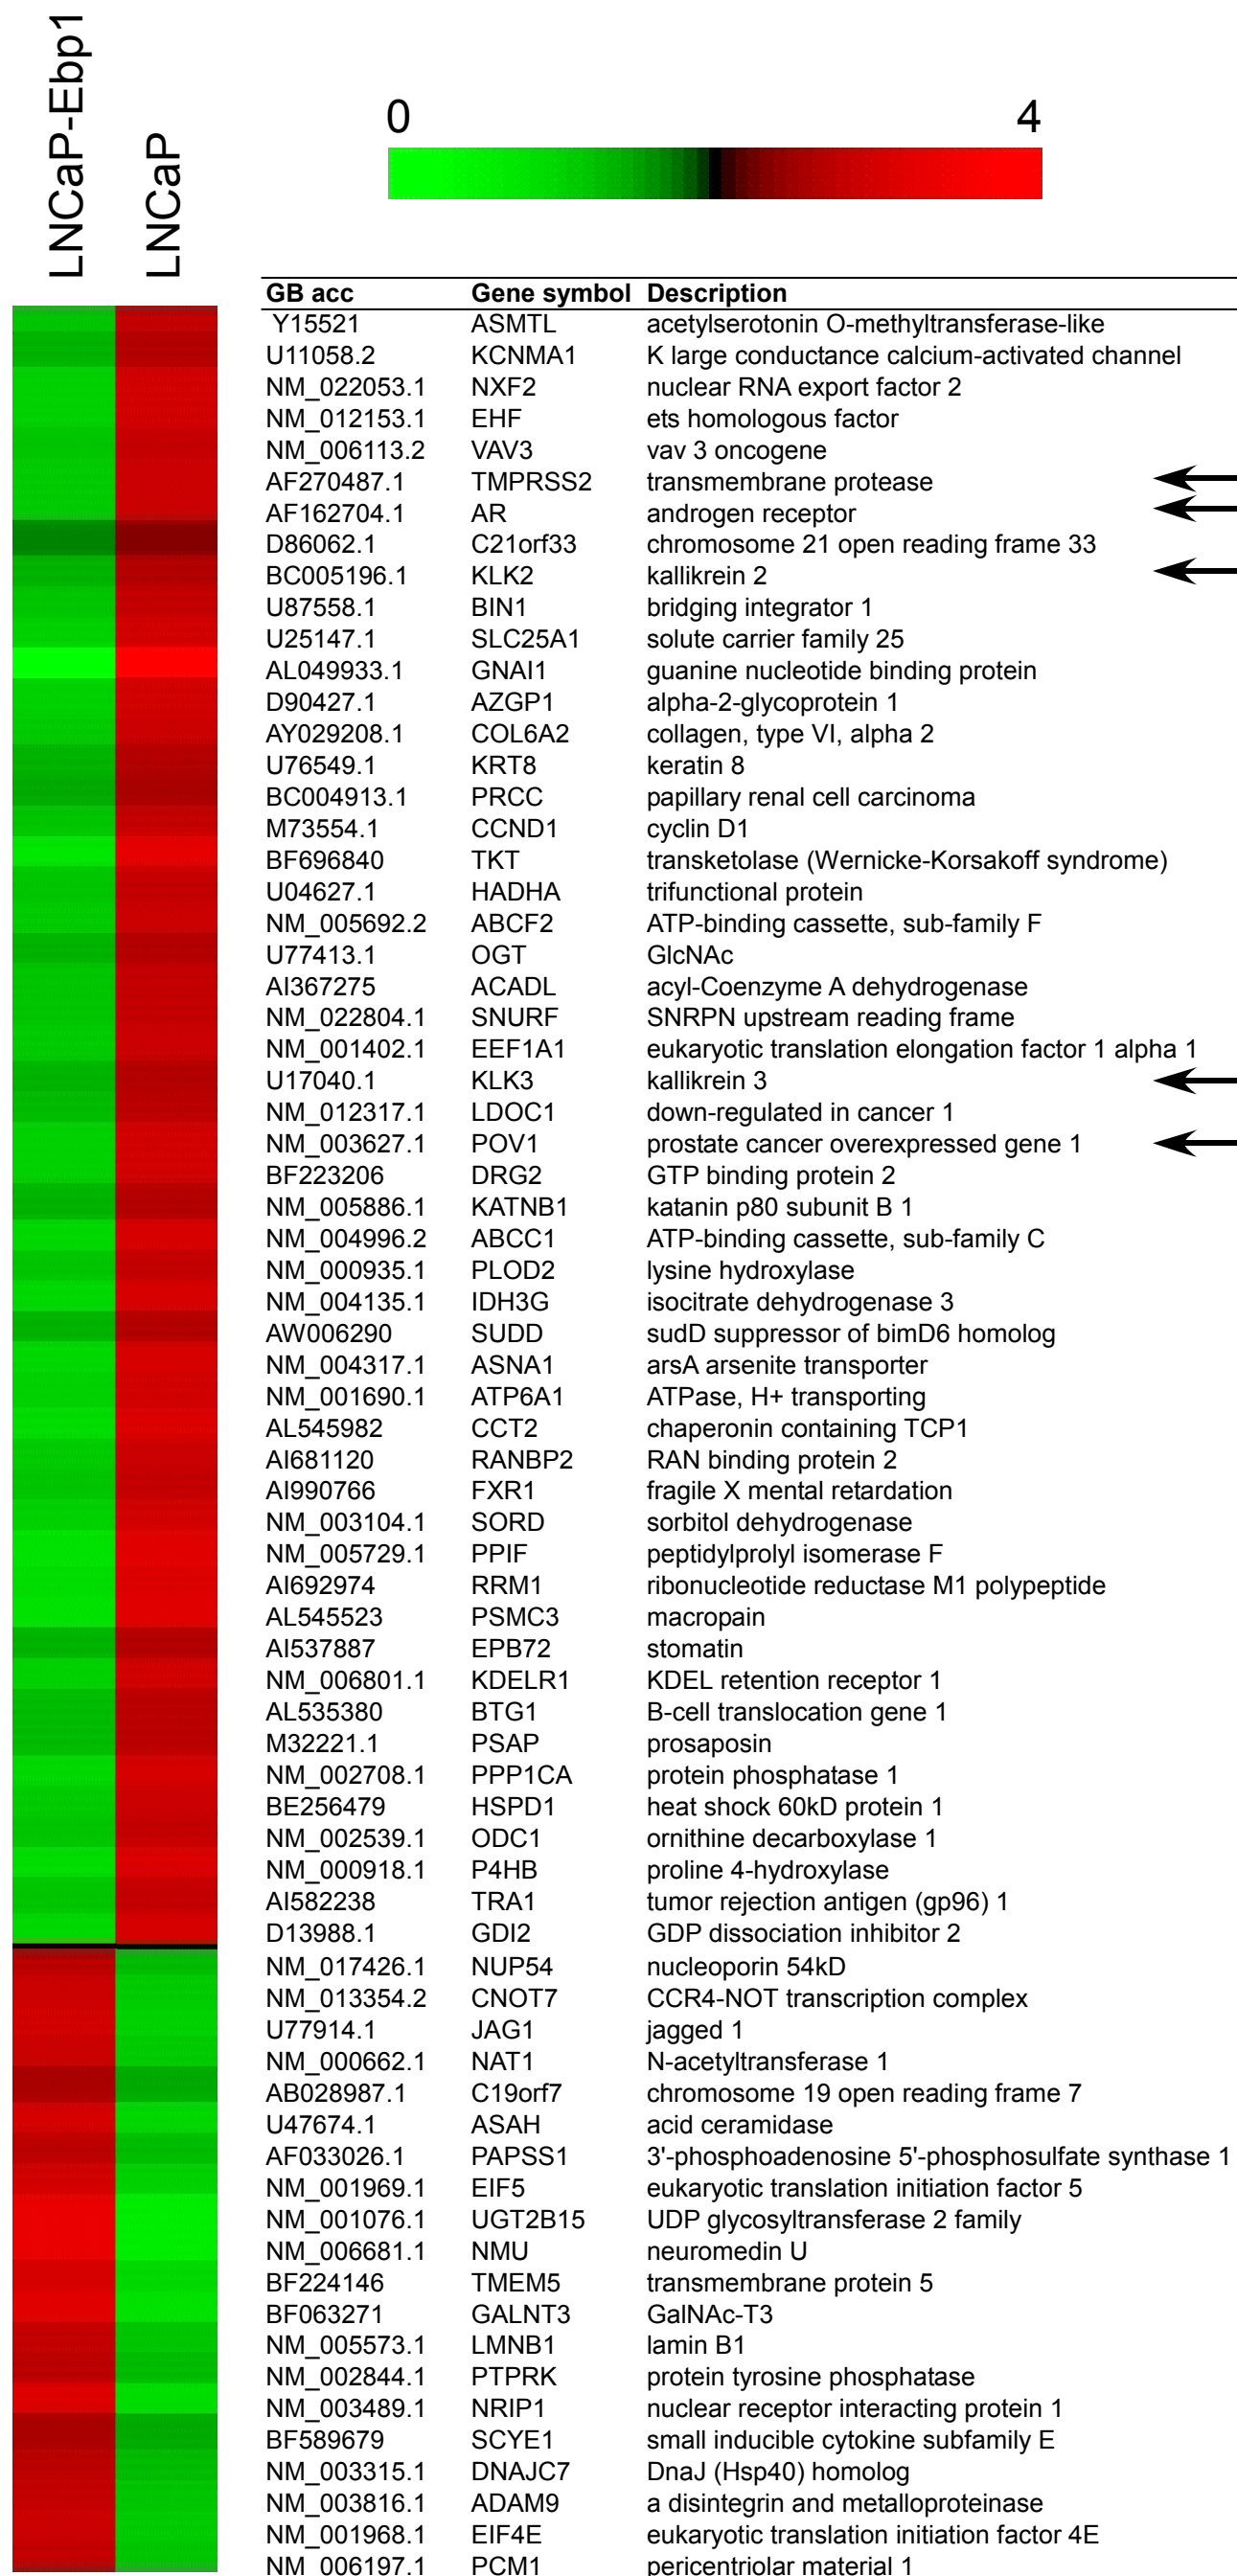

Supplement: pnas_0503829102_1.pdf [file pnas_0503829102_1.pdf]
